# Supplementary material for: RNA-mediated paternal heredity of diet-induced obesity and metabolic disorders
Source: PubMed Central journal article supplement (PMC4677355; doi:10.1038/srep18193), 2015-12-14
Supplement: srep18193-s1.pdf [file srep18193-s1.pdf]

## **RNA-mediated paternal heredity of diet-induced obesity and metabolic disorders**

Valérie Grandjean<sup>1,2,3</sup>§, Sandra Fourré<sup>4</sup>, Diana Andrea Fernandes De Abreu<sup>5</sup>, Marie-Alix Derieppe<sup>1,2,3</sup>, Jean-Jacques Remy<sup>5</sup> and Minoou Rassoulzadegan<sup>1,2,3</sup>

<sup>1</sup>Inserm, U1091, Nice, F-06108; <sup>2</sup>CNRS, UMR7277, F-06108, France; <sup>3</sup>University of Nice-Sophia Antipolis, UFR Sciences, Nice, F-06108; <sup>4</sup>Institut de Pharmacologie Moléculaire et Cellulaire (IPMC), UMR 6079 CNRS-UNSA, Sophia Antipolis, France; <sup>5</sup>UMR Inra 1355, CNRS 7254, UNS, Sophia Antipolis, France.

§ Corresponding author:

University of Nice Sophia Antipolis (UNS)

Faculty of Sciences, Parc Valrose,

Institut de Biologie Valrose, iBV

UMR CNRS 7277/Inserm 1091/University Nice Sophia Antipolis

BP 2135

06108 NICE CEDEX 2, FRANCE

Phone : +33 4 92 07 64 09

Fax : +33 4 92 07 64 02

Email address: [grandjea@unice.fr](mailto:grandjea@unice.fr)

## Supplementary Information

- Supplementary Figure Legends
- 2 supplementary Figures (S1 through S2)
- 4 supplementary Tables (S1 through S4)
- Supplementary references

### Supplementary figure legends

Supplementary Figure S1. **Volcano Plot.** The Log Odds (or B value) on the x-axis is the odds (or probability) that the gene is differentially expressed between Standard and Western-like Diet testis. A log Odds value of 0 corresponds to 50-50 chance that the gene is differentially expressed. The y-axis indicates the log<sub>2</sub> value of fold changes between the two conditions. B. MA Plot. The x-axis is the average expression level among the two conditions, indicating the basal expression level. And the y-axis is the fold change (log<sub>2</sub> scale), which indicates the difference level between the two. Each gene is represented on the plot as a single dot. Genes, up- or down-regulated in the Western-like Diet compared to the Standard Diet, correspond to blue spots and are listed in Table S2.

Supplementary Figure S2. **Spectrometric RNA quality checks.** RNAs prepared for microinjection were verified using Agilent Bioanalyser 2100 apparatus. The profiles indicate that both standard and western sperm RNA samples contain no apparent ribosomal RNA which are consistent with pure RNA sperm preparation.

### Supplementary references

- 1 Roovers, E. F. *et al.* Piwi proteins and piRNAs in mammalian oocytes and early embryos. *Cell Rep* **10**, 2069-2082 (2015).
- 2 Rosenkranz, D. & Zischler, H. proTRAC--a software for probabilistic piRNA cluster detection, visualization and analysis. *BMC Bioinformatics* **13**, 5 (2012).

Volcano Plot

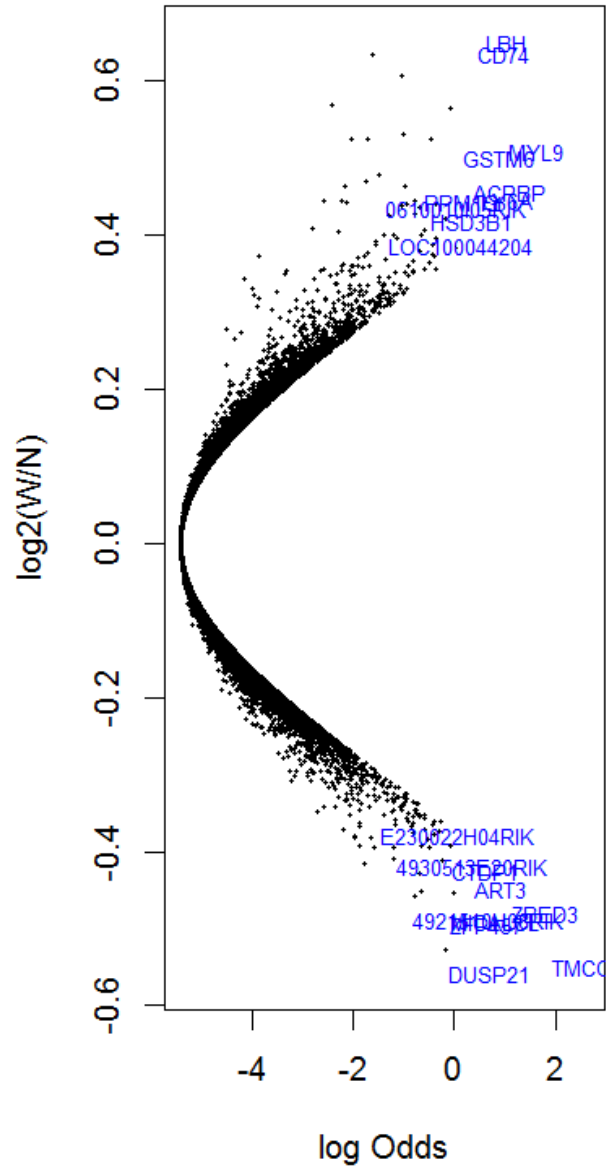

MA Plot

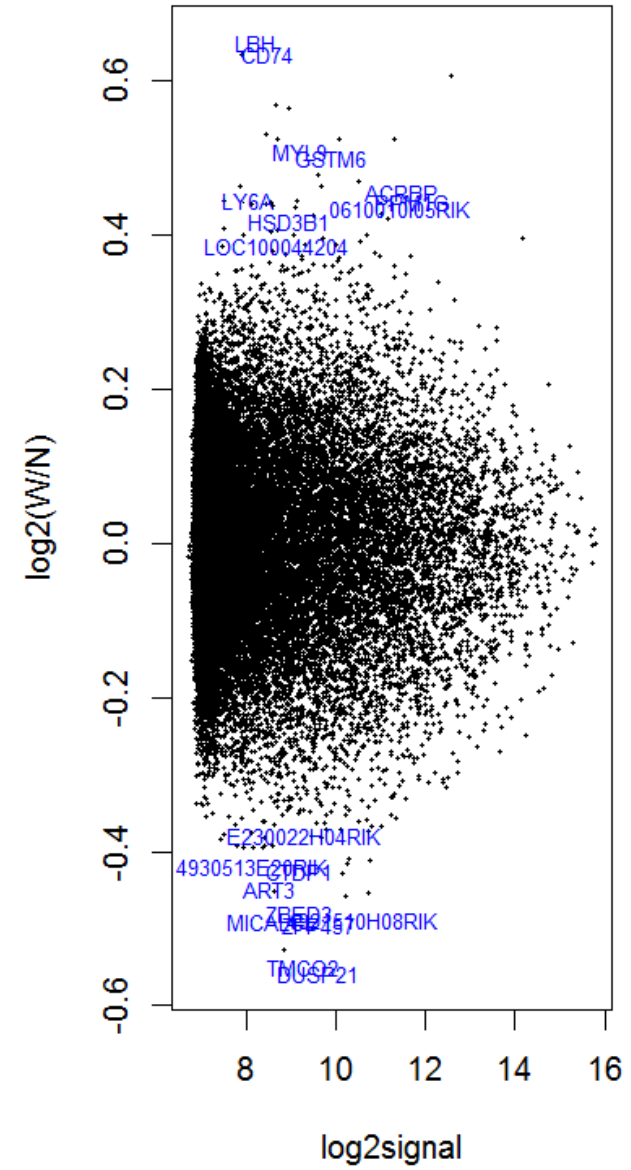

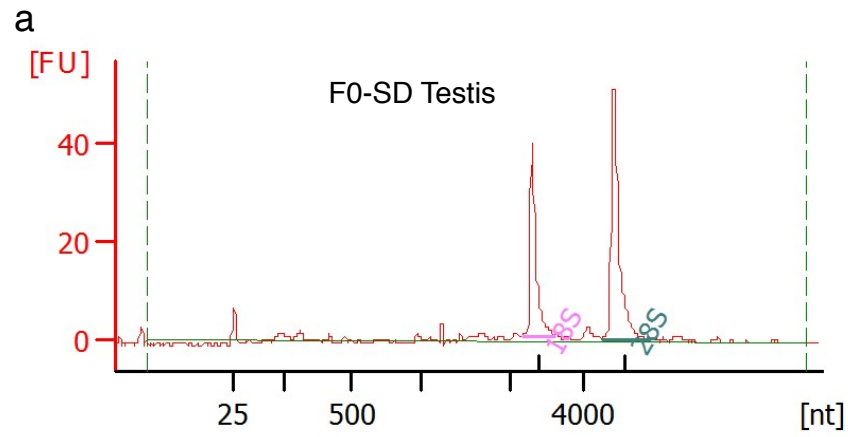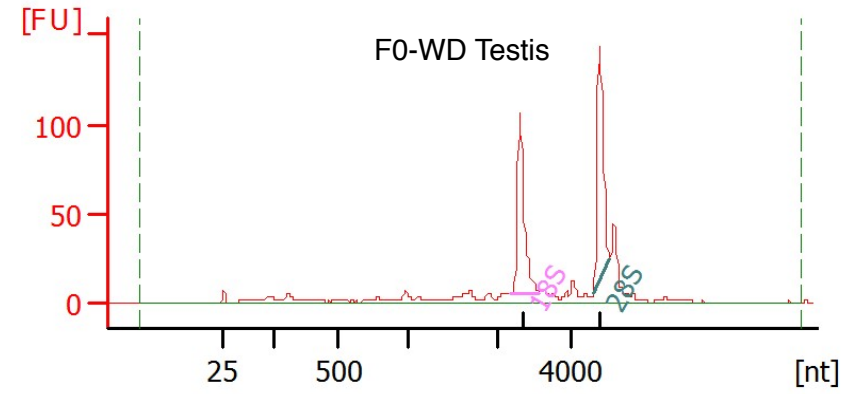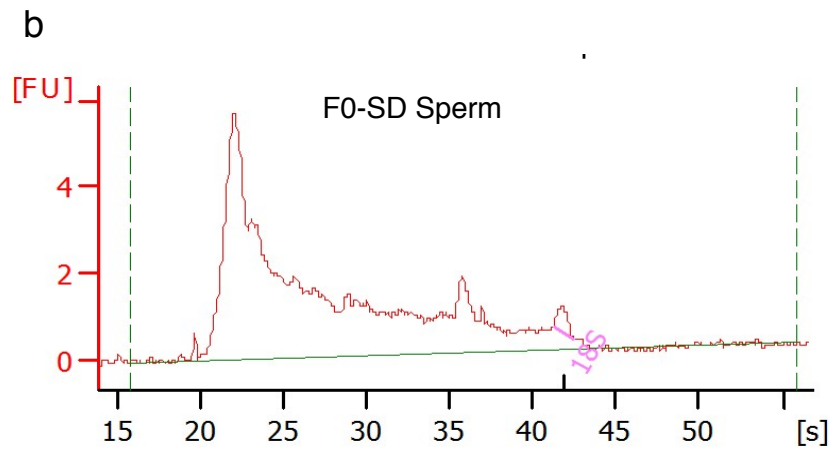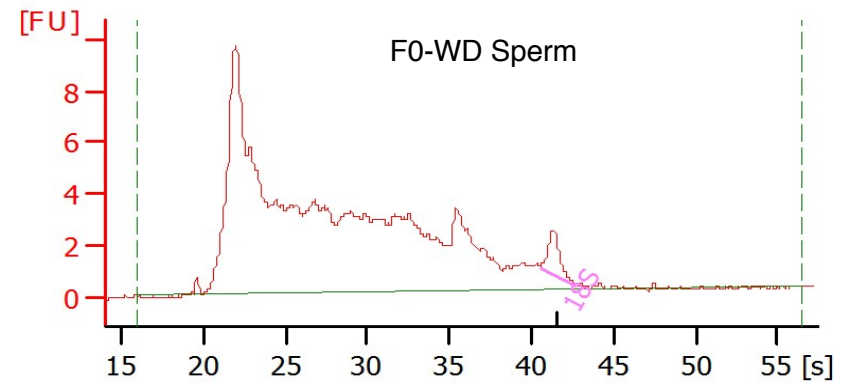

---

Table S1 Experimental diet nutritional composition

---

|                          | Standard Diet <sup>a</sup> | Western Diet <sup>a</sup> |
|--------------------------|----------------------------|---------------------------|
| Carbohydrates (kcal%)    | 59,9 (of which sugar 3,2%) | 46,1 (of which sugar 34%) |
| Proteins (kcal%)         | 16,1                       | 15,3                      |
| Lipids (kcal%)           | 3,1                        | 17,9                      |
| Caloric intake (kcal/kg) | 2791                       | 4035                      |

---

<sup>a</sup>Standard Diet and Western Diet formulation according to SAFE

---

Supplementary Table S2. Genes up- or down-regulated in the Western Diet compared to the Standard Diet.

| TargetID     | IlluminaProbe | log2signal | log2(W/N)  | p-value    | N       | N3      | N4      | W       | W2     | W4      |
|--------------|---------------|------------|------------|------------|---------|---------|---------|---------|--------|---------|
| DUSP21       | 6480196       | 9,58580985 | -0,5573977 | 8,37E-05   | 712     | 1085,7  | 1242,9  | 658     | 540,8  | 621,6   |
| TMCO2        | 1170377       | 9,25456911 | -0,550455  | 3,91E-06   | 655,4   | 840,3   | 861,2   | 484,6   | 488,6  | 471,9   |
| OTTMUSG00C   | 5130528       | 8,81610352 | -0,5273555 | 0,00029025 | 524     | 688,3   | 510,6   | 420,7   | 285,6  | 384,8   |
| ZFP457       | 6420563       | 9,62767069 | -0,4944659 | 8,59E-05   | 877,5   | 1199,4  | 931,9   | 682,4   | 573,3  | 653,8   |
| MICALCL      | 6520224       | 8,5827955  | -0,4909786 | 6,86E-05   | 361,7   | 635,5   | 473,7   | 310,4   | 344,5  | 277,2   |
| 4921510H08R  | 4900639       | 10,5933185 | -0,4878514 | 8,20E-05   | 1527,8  | 2663,4  | 1809,3  | 1242,1  | 1265,8 | 1178,4  |
| ZBED3        | 1740161       | 9,20381296 | -0,4792123 | 1,50E-05   | 683,5   | 724,2   | 793,4   | 474,7   | 488,1  | 467,7   |
| PSMD6        | 6180088       | 10,2093418 | -0,4584601 | 0,00072592 | 1081,1  | 1836,1  | 1619,9  | 979,6   | 1210,3 | 727,8   |
| 1700015E13R  | 3940408       | 10,722115  | -0,4538694 | 0,0002383  | 1392,4  | 2593,9  | 2594,5  | 1247,9  | 1347   | 1485,1  |
| LOC213411    | 4670632       | 8,60459717 | -0,4523619 | 0,00059628 | 410,8   | 671,2   | 391,3   | 365,9   | 319,2  | 276,3   |
| ART3         | 7000500       | 8,50666247 | -0,4484799 | 5,82E-05   | 336,5   | 553,4   | 477,2   | 257     | 380,1  | 271,9   |
| HIPK4        | 2350546       | 10,1310882 | -0,427455  | 0,00062764 | 862,2   | 1829    | 1668,2  | 818     | 1018,2 | 910,5   |
| CTDP1        | 520746        | 9,18156581 | -0,4253574 | 9,21E-05   | 632,9   | 765,1   | 732,6   | 499,5   | 459,6  | 478,8   |
| 4930513E20R  | 460187        | 8,15378688 | -0,4183476 | 0,00013285 | 281,1   | 394,2   | 364,3   | 222,5   | 234,1  | 254,7   |
| SUGT1        | 580152        | 10,7660794 | -0,4114791 | 0,00033175 | 1563    | 2793    | 2226,8  | 1361,5  | 1503,1 | 1402,8  |
| NMT2         | 6450373       | 7,93415203 | -0,3940891 | 0,00047263 | 226     | 384,4   | 285,8   | 182,3   | 217,7  | 219,4   |
| MED7         | 6420156       | 7,76468368 | -0,3931397 | 0,00059852 | 228,2   | 305,8   | 246,9   | 172     | 173,3  | 206,5   |
| TMEM209      | 6420367       | 8,58318223 | -0,3916577 | 0,00025476 | 350,9   | 551,1   | 506,8   | 290,8   | 355,8  | 319,8   |
| A430037M23I  | 6060544       | 7,43603018 | -0,3833058 | 0,00049556 | 167,2   | 216,7   | 239,6   | 135,2   | 164,9  | 142,5   |
| E230022H04R  | 4880390       | 9,31165764 | -0,379095  | 0,00020248 | 762     | 798,1   | 736,7   | 562,3   | 528,1  | 504,5   |
| LOC10004783  | 6130202       | 7,50182954 | -0,3769548 | 0,00041841 | 195     | 226,8   | 219,9   | 141,4   | 183,4  | 141,2   |
| UCHL5IP      | 4570079       | 8,11939124 | -0,3759743 | 0,00074363 | 257,9   | 411,7   | 338,2   | 230,8   | 252,2  | 221,8   |
| RHBDL2       | 2970307       | 10,7146008 | -0,3726464 | 0,00036209 | 1728,8  | 2221,6  | 2189,7  | 1423,9  | 1420,5 | 1349,5  |
| ATP5SL       | 5270131       | 9,77181887 | -0,3720594 | 0,00054409 | 710,8   | 1331,1  | 1234    | 566,3   | 758,5  | 891,9   |
| SOX5         | 5050082       | 11,0081401 | -0,3682525 | 0,00077092 | 2282,3  | 2958,8  | 2302,2  | 1946,2  | 1631,3 | 1547,4  |
| ZFH3         | 150605        | 7,76360962 | -0,3649002 | 0,00043974 | 209,6   | 313,6   | 255,7   | 173,4   | 207,9  | 176,3   |
| WDR35        | 5080072       | 9,55754216 | -0,3620437 | 0,00074968 | 750,9   | 1039,5  | 946     | 607,2   | 598,8  | 695,1   |
| KHSRP        | 4920593       | 8,39745294 | -0,3616897 | 0,00084951 | 301,5   | 463,1   | 460,3   | 248,8   | 273,9  | 342,8   |
| LOC10004067  | 2940673       | 10,5172777 | -0,3612726 | 0,00041008 | 1714,1  | 1770,5  | 1824,1  | 1339,9  | 1079,4 | 1260,8  |
| FANCL        | 6620240       | 8,37418001 | -0,3608961 | 0,00034809 | 343,6   | 436     | 404,1   | 261     | 296,4  | 287,6   |
| TIMP3        | 1400309       | 8,91589322 | 0,35602822 | 0,00054995 | 369,6   | 520,3   | 461,9   | 422     | 655,7  | 506,8   |
| LAMB2        | 6840209       | 7,89516815 | 0,35652882 | 0,00038822 | 163,7   | 272,6   | 235,2   | 195,9   | 328,4  | 269,9   |
| 1700029F12RI | 1770504       | 11,2915265 | 0,35995174 | 0,00086015 | 2524,9  | 2248,3  | 2319,5  | 2832,7  | 2221,7 | 3040,8  |
| AMHR2        | 3310739       | 8,52406641 | 0,36366088 | 0,00047346 | 307,7   | 411,2   | 305,2   | 339,2   | 470,2  | 397,5   |
| CD151        | 1400630       | 10,0151647 | 0,36677298 | 0,00075086 | 798,1   | 1122,2  | 1005,9  | 817     | 1356,5 | 1219,8  |
| SPTLC1       | 450048        | 9,21445583 | 0,37225431 | 0,00041237 | 447,6   | 612,9   | 605,5   | 588,8   | 733,2  | 607,9   |
| ALDH1A2      | 6330008       | 8,86333918 | 0,37434794 | 0,00042977 | 384,4   | 425,1   | 478,2   | 413,6   | 549,1  | 564     |
| MRPL4        | 4810100       | 8,56874317 | 0,37854329 | 0,00063127 | 317,7   | 350,1   | 378,3   | 323,6   | 428,2  | 511,4   |
| GLOXD1       | 6480609       | 7,46384962 | 0,38515349 | 0,00020998 | 123,3   | 193,3   | 171,6   | 156,9   | 241,1  | 195     |
| LOC10004420  | 3830048       | 8,67174533 | 0,38627035 | 0,00018334 | 279     | 489,5   | 380,3   | 323,4   | 581,1  | 466,2   |
| LOC10004650  | 4610397       | 9,28995922 | 0,38718891 | 0,00042973 | 480,5   | 640,1   | 624,2   | 549,8   | 666,3  | 858,1   |
| DEFB19       | 2030088       | 14,1621756 | 0,39594323 | 0,00039391 | 15501,3 | 20021,7 | 15849,5 | 16406,8 | 25160  | 18816,3 |
| TGM2         | 7000187       | 9,06624757 | 0,40106689 | 0,00059245 | 340,1   | 607,5   | 576,7   | 396,6   | 875,1  | 565,4   |
| ATP6V0D1     | 6290673       | 8,70114094 | 0,40676388 | 0,00053496 | 346,2   | 364     | 425,1   | 343,9   | 522    | 531,1   |
| HSD3B1       | 360463        | 8,94033029 | 0,41807307 | 0,00013645 | 382     | 489,9   | 470,3   | 493,5   | 648,1  | 493,5   |
| SLC25A5      | 5870092       | 11,1597012 | 0,42048999 | 0,0002995  | 1814,5  | 2316,3  | 2223,7  | 1865,2  | 3058,4 | 2653,4  |
| EG668668     | 7570762       | 11,0204684 | 0,42660908 | 0,00069992 | 1603,9  | 1901    | 2268,5  | 1710,1  | 2876,5 | 2314    |
| 0610010I05RI | 3990427       | 11,4512637 | 0,43483371 | 0,00020984 | 2889,8  | 2495,8  | 2352,3  | 2987,6  | 3011,7 | 3171,2  |
| INHA         | 240739        | 8,5961062  | 0,43813215 | 0,00103142 | 348,1   | 306,1   | 390     | 348,8   | 529    | 430,5   |
| PPM1G        | 3370546       | 11,6981224 | 0,44411152 | 0,00018829 | 3492,3  | 2588,7  | 3114,6  | 3632,6  | 3346,5 | 3964,7  |
| LY6A         | 1690187       | 8,02745599 | 0,44528579 | 4,91E-05   | 185,2   | 297,7   | 225,1   | 218,1   | 405,5  | 280,8   |
| ACRBP        | 2320017       | 11,4902449 | 0,45586514 | 4,42E-05   | 2786,5  | 2404,2  | 2708,5  | 3214    | 2993,7 | 3291,4  |

The experimental design is shown in Figure 1. Total RNAs from animal testes at four months old were prepared and subjected to analysis (Microarray Service CS3021 Illumina Gene Exp Process Ref: 338908 Qiagen). The resulting microarray data compared three males fed the WD diet (W, W2 and W4) to standards (N, N3 and N4). The RNA levels of WD-fed mice were compared to controls. Colon D ratios (W/S): colour ranged from green for lower expression to red for higher expression in WD.







Table S4: Mapping of the deregulated piRNAs to known piRNA clusters

| Chromosome localization | Start     | End       | Cluster number | Number of deregulated piRNA/cluster |
|-------------------------|-----------|-----------|----------------|-------------------------------------|
| chr1                    | 57348009  | 57362762  | 9              | 1                                   |
| chr1                    | 91551282  | 91560929  | 22             | 1                                   |
| chr1                    | 92988215  | 93000921  | 23             | 2                                   |
| chr10                   | 85848012  | 85855029  | 88             | 1                                   |
| chr10                   | 94670068  | 94680641  | 93             | 1                                   |
| chr10                   | 127690863 | 127704362 | 96             | 1                                   |
| chr10                   | 62651034  | 62694021  | 69             | 2                                   |
| chr10                   | 86560003  | 86596028  | 89             | 2                                   |
| chr10                   | 85740002  | 85774027  | 86             | 3                                   |
| chr10                   | 66680002  | 66709815  | 70             | 4                                   |
| chr11                   | 107990084 | 108001964 | 167            | 1                                   |
| chr11                   | 5526240   | 5536022   | 103            | 2                                   |
| chr11                   | 103420011 | 103453008 | 162            | 2                                   |
| chr12                   | 98379001  | 98455979  | 204            | 13                                  |
| chr13                   | 53393064  | 53407849  | 226            | 1                                   |
| chr14                   | 24078000  | 24124942  | 248            | 1                                   |
| chr14                   | 24421041  | 24433017  | 250            | 1                                   |
| chr14                   | 44759007  | 44791890  | 255            | 1                                   |
| chr14                   | 44932114  | 44946021  | 256            | 1                                   |
| chr15                   | 73094010  | 73110057  | 276            | 1                                   |
| chr15                   | 79924089  | 79934896  | 287            | 1                                   |
| chr15                   | 83349097  | 83369988  | 299            | 1                                   |
| chr15                   | 74625035  | 74667908  | 279            | 3                                   |
| chr15                   | 78642001  | 78675022  | 283            | 3                                   |
| chr15                   | 59245061  | 59304022  | 275            | 6                                   |
| chr17                   | 22511012  | 22522028  | 340            | 1                                   |
| chr17                   | 66148680  | 66159006  | 372            | 1                                   |
| chr17                   | 66164005  | 66233002  | 373            | 3                                   |
| chr17                   | 27283000  | 27370953  | 350            | 6                                   |
| chr18                   | 67028034  | 67088022  | 389            | 8                                   |
| chr19                   | 37252052  | 37264978  | 403            | 1                                   |
| chr2                    | 127687043 | 127706875 | 443            | 1                                   |
| chr2                    | 151139086 | 151162029 | 456            | 1                                   |
| chr2                    | 151245426 | 151267020 | 457            | 2                                   |
| chr2                    | 151315256 | 151336029 | 458            | 3                                   |
| chr2                    | 151398016 | 151420600 | 459            | 3                                   |
| chr2                    | 92536004  | 92613016  | 430            | 11                                  |
| chr3                    | 20460000  | 20469958  | 494            | 1                                   |
| chr3                    | 124398138 | 124419933 | 520            | 1                                   |
| chr4                    | 57353369  | 57369005  | 535            | 1                                   |
| chr4                    | 62216001  | 62243018  | 538            | 1                                   |
| chr4                    | 123888001 | 123899426 | 556            | 1                                   |
| chr4                    | 123831081 | 123846028 | 555            | 2                                   |

|      |           |           |     |    |
|------|-----------|-----------|-----|----|
| chr4 | 94277004  | 94338846  | 540 | 6  |
| chr5 | 130149032 | 130159006 | 633 | 1  |
| chr5 | 113316068 | 113373001 | 614 | 3  |
| chr5 | 149786048 | 149834611 | 657 | 7  |
| chr6 | 85983003  | 85994796  | 685 | 1  |
| chr6 | 128179025 | 128204765 | 709 | 1  |
| chr6 | 128440015 | 128453028 | 710 | 1  |
| chr6 | 127778004 | 127842026 | 708 | 5  |
| chr7 | 52903534  | 52918016  | 737 | 1  |
| chr7 | 125323006 | 125337723 | 758 | 3  |
| chr7 | 73098005  | 73154023  | 740 | 7  |
| chr7 | 73774005  | 73842029  | 741 | 8  |
| chr7 | 69879006  | 69940023  | 739 | 10 |
| chr8 | 27291000  | 27301030  | 773 | 1  |
| chr8 | 37089005  | 37096684  | 775 | 1  |
| chr8 | 110118003 | 110134528 | 803 | 1  |
| chr8 | 92185128  | 92202847  | 794 | 3  |
| chr9 | 44139170  | 44153876  | 832 | 1  |
| chr9 | 54206007  | 54266025  | 840 | 9  |
| chr9 | 67689001  | 67763015  | 849 | 10 |

---

97% deregulated piRNAs were mapped to known clusters using the piRNA cluster data base provided on the web site <http://www.smallrnagroup.uni-mainz.de><sup>1,2</sup>. Only piRNA clusters with deregulated piRNA are listed.
